# Supplementary material for: The Role of Serine-Type Serine Repeat Antigen in Plasmodium yoelii Blood Stage Development
Source: PLoS One. 2013 Apr 25;8(4):e60723. doi: 10.1371/journal.pone.0060723 (PMC3636278; doi:10.1371/journal.pone.0060723)
Supplement: Dataset S2 — List of genes differentially expressed between P.yoelii YM and YA strains. This dataset includes the 945 genes. * indicates the presence of the differences in all three asexual blood stages. Numbers presented here are the log2 ratio between YM and YA strains. (XLSX) [file pone.0060723.s007.xlsx]

## Sheet: dataset2
This dataset includes the 945 genes that showed to be differentially expressed between P.yoelii YM and YA strains. * indicates the presence of the differences in all three asexual blood stages. Numbers presented here are the log2 ratio between YM and YA strains.
Gene ID	PlasmoDB Annotation	Ring	Trophozoite	Schizont	All stages
PY00021	Actin	1.026	1.507	1.51	*
PY00048	hypothetical protein	0.5472	-0.03615	1.227
PY00089	putative yir3 protein	4.511	4.915	5.189	*
PY00102	phosphatidylinositol transfer protein 2	1.232	1.578	1.637	*
PY00120	putative 26S proteasome subunits	2.183	3.28	3.679	*
PY00173	putative bir1 protein	2.003	2.338	2.541	*
PY00174	hypothetical protein	1.893	1.432	1.746	*
PY00175	putative bir1 protein	4.228	2.634	4.271	*
PY00177	putative yir4 protein	-5.289	-5.84	-6.277	*
PY00178	hypothetical protein	1.353	2.757	2.87	*
PY00183	Ubiquitin family, putative	2.642	2.775	2.534	*
PY00193	hypothetical protein	2.363	2.738	2.627	*
PY00198	hypothetical protein	2.121	2.124	1.8	*
PY00207	ABC transporter-like protein	0.825	1.068	1.445
PY00208	MORN repeat, putative	0.3572	-0.07711	-1.491
PY00216	phosphatase	0.1656	-0.006751	-1.142
PY00228	hypothetical protein	-2.345	-0.7553	-0.6713
PY00233	hypothetical protein	-0.7395	0.04069	-1.153
PY00251	hypothetical protein	-1.398	-0.2521	-1.12
PY00258	hypothetical protein	1.253	1.722	2.189	*
PY00259	hypothetical protein	1.121	1.474	1.034	*
PY00279	putative yir1 protein	4.437	4.473	4.315	*
PY00281	hypothetical protein	-1.403	-1.617	-1.849	*
PY00291	SERA-3	1.783	3.318	3.471	*
PY00292	Papain family cysteine protease, putative	1.38	3.463	3.286	*
PY00301	putative yir1 protein	1.453	1.518	2.073	*
PY00319	aconitate hydratase 1	-1.148	-0.8316	-0.8825
PY00324	hypothetical protein	-0.2451	-0.196	-4.373
PY00329	hypothetical protein	-0.4498	-0.7078	-1.125
PY00347	hypothetical protein	1.454	2.478	2.663	*
PY00349	adi-related	-0.7522	-1.093	-0.7278
PY00350	putative yir2 protein	4.905	4.717	5.469	*
PY00358	hypothetical protein	0.5284	1.007	1.409
PY00380	hypothetical protein	-1.07	-0.4675	-1.227
PY00383	hypothetical protein	-0.4947	-0.3222	-1.058
PY00390	putative yir3 protein	-2.399	-2.322	-2.017	*
PY00399	hypothetical protein	1.515	2.52	2.091	*
PY00400	putative bir1 protein	4.304	2.823	3.908	*
PY00402	hypothetical protein	0.03394	0.02312	1.168
PY00409	myosin A tail domain interacting protein MTIP	-1.223	0.272	-0.8178
PY00426	hypothetical protein	0.6486	1.12	1.413
PY00462	hypothetical protein	0.7441	0.6686	1.26
PY00474	mature parasite-infected erythrocyte surface antigen	-1.488	-0.2018	-0.9717
PY00475	probable lipoate-protein ligase a-related	0.5833	1.101	1.195
PY00479	TERT gene, putative	-0.2297	0.7858	1.17
PY00488	putative yir4 protein	1.413	1.48	1.82	*
PY00492	hypothetical protein	-1.701	-2.435	-1.974	*
PY00497	Drosophila melanogaster CG14903 gene product	1.135	1.053	1.355	*
PY00498	putative yir3 protein	2.408	2.162	2.63	*
PY00501	Plasmodium vivax PV1H14095_P-related	0.2363	0.9601	1.151
PY00513	vacuolar-type H+ pumping pyrophosphatase-related	-3.384	-3.382	-3.547	*
PY00522	28 kDa ookinete surface protein	-2.001	-0.5916	-1.305
PY00523	ookinete surface antigen-like protein Pfs28	-1.972	-0.4385	-0.2739
PY00532	hypothetical protein	1.562	2.327	1.633	*
PY00551	hypothetical protein	2.862	2.117	2.876	*
PY00566	small heat shock protein	-0.8589	-0.5597	-1.159
PY00568	hypothetical protein	0.1259	1.177	0.7732
PY00578	putative yir2 protein	2.888	3.579	3.879	*
PY00580	putative yir3 protein	4.078	3.961	2.678	*
PY00581	hypothetical protein	0.3875	1.216	1.251
PY00590	putative ubiquitin-conjugating enzyme 16	1.759	2.027	2.292	*
PY00599	Plasmodium falciparum CPW-WPC domain, putative	-1.79	-0.4906	-1.129
PY00600	hypothetical protein	2.948	3.952	3.252	*
PY00604	roadblock	-1.463	-1.159	-1.545	*
PY00609	PH domain, putative	-0.5657	-0.1465	-1.046
PY00610	putative yir4 protein	5.945	5.51	5.932	*
PY00641	hypothetical protein	0.0825	-0.3265	-1.049
PY00653	chromosome segregation protein smc1	5.235	7.045	7.821	*
PY00677	hypothetical protein	0.9018	1.852	1.484
PY00694	hypothetical protein	5.606	2.244	2.615	*
PY00697	hypothetical protein	1.512	2.013	2.057	*
PY00719	hypothetical protein	0.7813	1.326	2
PY00734	hypothetical protein	-0.4348	-1.375	-1.237
PY00809	cell division protein	0.9094	1.616	1.597
PY00811	hypothetical protein	-0.3435	-0.3874	-1.191
PY00813	hypothetical protein	1.285	2.12	2.181	*
PY00814	putative yir4 protein	-1.031	-1.276	-1.235	*
PY00816	hypothetical protein	1.044	1.307	1.14	*
PY00825	tRNA-guanine transglycosylase-related	1.384	1.607	1.386	*
PY00828	unknown protein-related	0.4571	1.817	1.804
PY00830	probable ATP-dependent RNA helicase has1	-0.9036	-1.301	-1.04
PY00831	hypothetical protein	1.997	0.8945	0.4913
PY00833	hypothetical protein	1.655	2.495	2.055	*
PY00837	ERYTHROCYTE MEMBRANE PROTEIN PFEMP3	1.134	1.283	1.431	*
PY00842	putative yir3 protein	1.654	2.315	2.214	*
PY00843	putative yir4 protein	3.732	4.204	4.397	*
PY00845	hypothetical protein	-4.141	-4.822	-5.435	*
PY00846	putative yir4 protein	-5.016	-5.579	-4.662	*
PY00859	hypothetical protein	-0.4095	-0.4014	-1.511
PY00860	hypothetical protein	-2.126	-0.4882	-1.173
PY00867	hypothetical protein	1.245	1.178	1.102	*
PY00878	Drosophila melanogaster CG15040 gene product	-0.2502	-1.28	-1.772
PY00879	CCAAT-box DNA binding protein subunit B, putative	-0.5753	-0.1691	-1.054
PY00888	hypothetical protein	0.3872	0.9278	1.445
PY00892	hypothetical protein	0.7768	-0.1094	-1.661
PY00905	hypothetical protein	-0.7999	-0.3454	-1.137
PY00906	hypothetical protein	-0.9104	-0.3219	-1.031
PY00908	similar to S. cerevisiae SIK1	3.101	3.519	2.908	*
PY00910	hypothetical protein	0.0311	-0.02908	-1.101
PY00915	Ser/Thr protein phosphatase, putative	-0.9826	-1.001	-0.2141
PY00924	putative yir4 protein	-6.973	-6.751	-5.906	*
PY00927	prolyl-tRNA synthetase-related	1.655	2.77	2.648	*
PY00930	hypothetical protein	-0.5844	0.005539	-1.044
PY00931	hypothetical protein	-1.282	-0.5106	-1.408
PY00932	hypothetical protein	1.387	2.181	1.853	*
PY00936	hypothetical protein	0.4736	1.036	0.6226
PY00942	hypothetical protein	-1.46	-0.1614	-0.655
PY00964	hypothetical protein	-1.06	-1.34	-0.968
PY00965	hypothetical protein	-0.2345	-0.9381	-1.317
PY00972	kinesin-related protein	0.9092	1.56	1.012
PY00973	RNA recognition motif, putative	2.824	3.073	2.724	*
PY00978	hypothetical protein	-0.9705	-0.3701	-1.28
PY01006	hypothetical protein	0.843	1.612	1.787
PY01007	93 kDa protein	-2.768	-2.759	-3.288	*
PY01012	hypothetical protein	1.024	1.471	1.397	*
PY01014	retinitis pigmentosa GTPase regulator-like protein	0.6015	1.244	0.8042
PY01016	RING-finger protein	2.144	3.979	4.356	*
PY01033	hypothetical protein	-0.1133	-0.08507	-1.183
PY01042	hypothetical protein	-0.8779	-0.1758	-1.297
PY01049	hypothetical protein	-0.7559	0.08969	-1.38
PY01079	putative yir3 protein	2.899	4.655	4.054	*
PY01080	putative yir4 protein	1.521	2.41	2.945	*
PY01082	hypothetical protein	-1.047	-1.186	-1.053	*
PY01095	ymf77	0.7252	1.375	0.8839
PY01096	MutS homolog 2-related	-0.3523	-0.9128	-1.177
PY01099	putative bir1 protein	-0.8808	-1.088	-0.8383
PY01110	putative bir1 protein	4.802	2.707	6.925	*
PY01113	hypothetical protein	2.547	2.669	3.228	*
PY01120	Arabidopsis thaliana BRAHMA ortholog-related	2.667	3.562	7.647	*
PY01121	hypothetical protein	-0.5717	-0.6682	-2.005
PY01137	hypothetical protein	-2.3	-0.1775	-0.3876
PY01149	hypothetical protein	-1.515	-0.5679	-1.072
PY01154	hypothetical protein	-0.09134	0.1581	-1.262
PY01162	putative yir1 protein	-1.127	-1.207	-0.9845
PY01174	putative yir1 protein	6.427	5.65	7.659	*
PY01175	hypothetical protein	1.038	0.2413	0.6097
PY01235	hypothetical protein	-0.06814	0.5026	1.413
PY01250	hypothetical protein	-1.068	-0.6358	-0.5002
PY01251	VPS45-like protein	1.696	2.211	2.501	*
PY01259	hypothetical protein	0.8869	1.224	0.3241
PY01262	hypothetical protein	0.7019	1.293	0.6022
PY01263	hypothetical protein	-0.9557	0.2795	-1.885
PY01265	hypothetical protein	-0.2807	-0.2179	-1.621
PY01271	ATP-dependent DNA helicase recQ-related	-0.6625	-0.4032	-1.05
PY01286	DnaJ domain, putative	-0.517	-0.7922	-1.038
PY01296	hypothetical protein	-2.441	-0.5527	-1.123
PY01298	hypothetical protein	-1.098	-0.6937	-1.102
PY01299	hypothetical protein	-1.743	-0.9078	-1.371
PY01301	Drosophila melanogaster LD15209p	2.513	2.992	2.866	*
PY01303	putative yir1 protein	2.266	2.417	2.593	*
PY01308	hypothetical protein	2.475	3.293	3.363	*
PY01310	hypothetical protein	-1.012	-1.029	-0.8035
PY01313	hypothetical protein	1.305	0.8203	0.7387
PY01318	putative yir3 protein	2.523	1.43	0.7419
PY01360	hypothetical protein	-0.9557	-1.313	-1.258
PY01365	rhoptry protein	3.053	3.429	2.328	*
PY01381	hypothetical protein	1.218	0.6428	0.5966
PY01394	putative yir3 protein	1.336	2.011	2.319	*
PY01397	hypothetical protein	2.878	2.424	3.47	*
PY01401	hypothetical protein	1.157	2.21	1.903	*
PY01404	putative yir3 protein	2.375	1.987	2.049	*
PY01406	putative yir1 protein	1.425	1.473	1.44	*
PY01414	hypothetical protein	0.9064	2.371	2.667
PY01417	putative yir1 protein	1.702	2.318	2.079	*
PY01433	hypothetical protein	-0.8321	-1.276	-1.4
PY01437	hypothetical protein	-0.3743	0.4938	1.265
PY01441	putative yir4 protein	5.28	4.49	3.625	*
PY01442	putative yir1 protein	1.21	0.8528	0.974
PY01443	hypothetical protein	0.4226	1.07	1.2
PY01458	hypothetical protein	0.703	0.7473	1.082
PY01460	mature parasite-infected erythrocyte surface antigen	-1.181	-0.5141	-1.748
PY01466	putative yir1 protein	4.095	4.151	3.167	*
PY01469	dynein light chain-related	-0.5547	-0.7911	-1.02
PY01478	hypothetical protein	0.665	1.055	1.18
PY01501	hypothetical protein	1.852	2.387	2.298	*
PY01507	hypothetical protein	0.8858	1.01	1.273
PY01512	hypothetical protein	0.2463	-0.3623	-1.245
PY01522	hypothetical protein	1.861	2.98	2.935	*
PY01526	rhoptry protein	-2.142	-1.836	-1.608	*
PY01549	arabinogalactan protein	-0.8159	-0.7502	-1.004
PY01568	hypothetical protein	-1.654	-0.7622	-1.139
PY01582	hypothetical protein	-0.5074	-0.3278	-1.488
PY01585	hypothetical protein	-1.425	-0.2976	-0.9632
PY01588	hypothetical protein	2.052	2.235	2.019	*
PY01590	hypothetical protein	2.399	1.898	2.821	*
PY01598	putative yir3 protein	1.668	1.54	1.744	*
PY01602	hypothetical protein	3.68	5.405	5.725	*
PY01603	hypothetical protein	-0.9586	-1.312	-0.3077
PY01613	hypothetical protein	1.914	0.8423	-1.109
PY01614	hypothetical protein	1.416	0.4845	-1.089
PY01624	hypothetical protein	-1.834	-0.7572	-1.136
PY01625	hypothetical protein	1.389	1.569	1.737	*
PY01640	hypothetical protein	1.085	1.655	1.591	*
PY01660	probable citrate synthase, mitochondrial precursor	-1.042	-0.7026	-0.5402
PY01663	M83163 circumsporozoite protein-related	-1.2	-1.048	-0.6558
PY01667	ERYTHROCYTE MEMBRANE PROTEIN PFEMP3	-1.045	-1.328	-1.147	*
PY01684	hypothetical protein	-1.505	-1.59	-0.6993
PY01687	hypothetical protein	1.723	2.269	1.964	*
PY01692	putative yir4 protein	-0.9266	-1.104	-0.7956
PY01702	hypothetical protein	1.005	0.9213	0.8325
PY01720	putative yir3 protein	3.972	2.56	4.634	*
PY01745	putative ribosomal protein L11	2.599	3.162	3.46	*
PY01749	hypothetical protein	0.8886	1.438	1.652
PY01760	hypothetical protein	0.03753	0.2063	1.05
PY01767	hypothetical protein	-0.605	-1.138	-1.502
PY01768	hypothetical protein	-0.4922	-1.13	-1.528
PY01771	hypothetical protein	2.705	3.231	3.861	*
PY01772	hypothetical protein	0.2657	2.043	2.619
PY01774	putative yir4 protein	4.606	5.51	5.092	*
PY01787	putative yir1 protein	1.536	1.565	2.198	*
PY01799	hypothetical protein	-0.3334	0.03617	-1.548
PY01806	hypothetical protein	-0.5903	-1.034	-0.2425
PY01810	putative yir3 protein	3.691	4.237	3.942	*
PY01814	hypothetical protein	4.112	4.869	5.125	*
PY01842	putative yir3 protein	5.465	5.003	5.126	*
PY01855	Formin Homology 2 Domain, putative	-0.1694	-0.133	-1.042
PY01859	hypothetical protein	-0.1919	-0.2394	-1.073
PY01872	putative yir3 protein	6.604	7.12	9.429	*
PY01873	putative yir4 protein	4.745	6.567	3.068	*
PY01877	hypothetical protein	0.2713	0.2531	-1.374
PY01880	hypothetical protein	-0.9543	-1.034	-0.7536
PY01887	hypothetical protein	-0.9759	-0.6082	-1.231
PY01888	hypothetical protein	-2.354	-0.6632	-0.7019
PY01908	hypothetical protein	0.7724	1.374	1.578
PY01915	hypothetical protein	-1.513	-0.526	-1.424
PY01937	hypothetical protein	-0.1208	-0.3068	-1.116
PY01942	hypothetical protein	-1.07	-1.197	-0.6089
PY01956	hypothetical protein	-1.055	-0.781	-0.7548
PY01968	hypothetical protein	-4.826	-2.476	-3.069	*
PY01972	hypothetical protein	1.781	1.693	1.732	*
PY01981	putative yir4 protein	-3.823	-3.628	-3.603	*
PY02007	hypothetical protein	-0.4323	-0.2222	-1.368
PY02014	hypothetical protein	-0.7608	-1.008	-0.7711
PY02020	hypothetical protein	0.373	1.099	1.895
PY02032	hypothetical protein	-1.204	-0.6021	-0.2229
PY02037	hypothetical protein	-2.561	-1.582	-1.711	*
PY02054	hypothetical protein	-1.365	-0.3257	-1.159
PY02055	hypothetical protein	-1.644	0.1689	0.03425
PY02060	Arabidopsis thaliana At1g02330/T6A9_12-related	0.7116	1.389	1.179
PY02061	hypothetical protein	-1.02	-0.3825	-0.7781
PY02075	hypothetical protein	-1.222	-1.029	-0.8923
PY02085	aspartyl protease-like	0.4893	1.082	0.8237
PY02086	15 kDa protein-related	-2.392	-1.125	-0.8801
PY02100	hypothetical protein	5.837	4.769	4.412	*
PY02107	putative yir2 protein	1.728	0.8318	0.7827
PY02112	hypothetical protein	-0.06848	0.2436	1.293
PY02131	putative bir1 protein	6.617	4.498	4.305	*
PY02133	hypothetical protein	0.4023	1.146	1.344
PY02138	hypothetical protein	1.027	1.153	1.607	*
PY02144	hypothetical protein	-1.919	-1.936	-1.914	*
PY02145	hypothetical protein	-0.9196	-1.303	-0.6935
PY02147	Meloidogyne incognita COL-1-related	6.496	7.642	7.732	*
PY02152	hypothetical protein	2.423	2.676	2.389	*
PY02154	hypothetical protein	0.4018	0.9888	1.099
PY02166	hypothetical protein	1.006	0.3107	0.09325
PY02167	hypothetical protein	-1.46	-0.635	-1.267
PY02169	putative yir2 protein	0.9418	1.437	1.599
PY02177	CCAAT-box DNA binding protein subunit B	1.449	0.9052	0.6102
PY02199	hypothetical protein	0.8142	1.261	1.418
PY02207	hypothetical protein	-0.07737	0.7254	1.144
PY02235	hypothetical protein	1.091	0.8361	-0.9847
PY02239	mature-parasite-infected erythrocyte surface antigen	3.947	6.54	5.827	*
PY02249	hypothetical protein	1.497	1.195	0.8984
PY02251	hypothetical protein	1.076	0.8321	1.27
PY02252	deoxyribose-phosphate aldolase	1.482	1.784	2.421	*
PY02260	ring-infested erythrocyte surface antigen	0.3982	-0.1905	-1.265
PY02261	hypothetical protein	2.499	4.069	2.748	*
PY02274	hypothetical protein	-0.06575	-0.07872	-1.22
PY02289	CCAAT-box DNA binding protein subunit B, putative	5.914	6.265	5.975	*
PY02299	hypothetical protein	-1.738	-2.421	-2.515	*
PY02308	hypothetical protein	-1.37	-0.4158	-1.093
PY02328	unnamed protein product	0.2398	0.9265	1.02
PY02350	asparagine-rich protein	0.8493	1.286	1.137
PY02371	hypothetical protein	0.0712	0.2336	-1.107
PY02372	kinesin-like protein-related	0.3235	0.5606	-1.399
PY02382	hypothetical protein	0.79	-0.09025	1.219
PY02385	RNA polymerase Rpb7, N-terminal domain, putative	-1.062	-1.197	-0.6047
PY02391	hypothetical protein	-0.581	-0.06025	-1.004
PY02393	CCAAT-box DNA binding protein subunit B	1.201	2.012	1.845	*
PY02396	hypothetical protein	0.8421	0.6849	1.373
PY02413	CCAAT-box DNA binding protein subunit B	-0.1825	0.1061	-1.272
PY02415	conjugation stage-specific protein, putative	0.9841	1.166	1.246
PY02417	transport protein particle component Bet3p-like protein	1.009	0.7197	1.04
PY02427	mannosyltransferase-related	-0.8124	-0.1255	-1.096
PY02429	hypothetical protein	-0.253	-1.008	-0.8673
PY02434	hypothetical protein	-0.24	-0.3294	-1.062
PY02486	Drosophila melanogaster GM01605p	1.308	1.525	1.369	*
PY02489	hypothetical protein	2.072	3.093	3.218	*
PY02515	hypothetical protein	1.707	2.066	1.367	*
PY02518	hypothetical protein	1.041	0.9931	1.313
PY02528	uroporphyrinogen decarboxylase, putative	0.6985	0.9934	1.275
PY02529	hypothetical protein	-0.1506	-0.3907	-1.066
PY02546	hypothetical protein	0.772	1.829	1.298
PY02556	hypothetical protein	0.1887	-0.3682	-1.063
PY02559	methionine aminopeptidase, type II, putative	2.721	3.171	2.938	*
PY02560	putative yir4 protein	3.192	3.63	3.677	*
PY02573	putative phospho-ser/thr phosphatase	-0.4836	-0.09353	-1.128
PY02594	hypothetical protein	1.186	1.606	1.508	*
PY02596	hypothetical protein	-1.705	-1.178	-2.29	*
PY02604	hypothetical protein	1.954	1.969	2.402	*
PY02606	amine oxidase, flavin-containing, putative	-0.07322	-0.3312	-1.048
PY02612	putative yir4 protein	5.674	5.453	3.853	*
PY02641	hypothetical protein	0.7361	2.027	1.534
PY02647	Plasmodium vivax PV1H14195_P-related	12.74	13.67	9.341	*
PY02651	hypothetical protein	-1.109	-0.6432	-1.141
PY02653	hypothetical protein	-0.02888	-0.4191	-1.05
PY02658	hypothetical protein	1.837	3.389	2.978	*
PY02662	hypothetical protein	-1.711	-1.415	-1.084	*
PY02678	hypothetical protein	-1.646	-1.783	-0.4767
PY02684	hypothetical protein	0.5732	1.156	1.098
PY02685	proteasome subunit beta type 1-related	1.768	2.269	2.267	*
PY02686	Cyclin, putative	-0.2733	-0.4222	-1.24
PY02689	putative yir1 protein	1.022	1.281	1.796	*
PY02717	hypothetical protein	1.985	1.708	2.262	*
PY02721	PCI domain, putative	1.196	1.549	1.598	*
PY02722	60S ribosomal protein L6, putative	1.747	1.485	1.479	*
PY02727	putative yir4 protein	-0.8609	-1.034	-0.6555
PY02730	putative yir1 protein	1.434	1.252	1.27	*
PY02754	hypothetical protein	-1.579	-0.1953	-1.213
PY02755	hypothetical protein	-1.072	-0.08558	-1.067
PY02762	putative yir3 protein	-0.1782	0.936	1.89
PY02765	hypothetical protein	-1.218	-0.679	-1.033
PY02769	hypothetical protein	-1.99	-0.9059	-1.396
PY02770	hypothetical protein	-1.727	-0.452	-1.53
PY02784	uncharacterized domain 2, putative	1.196	0.8234	0.9754
PY02799	unnamed protein product	2.423	2.278	2.561	*
PY02824	putative yir1 protein	3.638	3.367	2.672	*
PY02831	putative yir3 protein	5.525	6.483	3.773	*
PY02863	hypothetical protein	1.089	1.113	1.444	*
PY02865	hypothetical protein	0.7971	1.926	2.085
PY02871	hypothetical protein	-2.466	-0.7852	-1.312
PY02878	hypothetical protein	-2.261	-0.4126	-1.205
PY02879	hypothetical protein	-3.091	-2.192	-2.408	*
PY02895	hypothetical protein	3.858	5.35	5.068	*
PY02915	homeobox-containing protein	-0.1075	-0.04039	-1.177
PY02934	hypothetical protein	0.1844	1.447	1.566
PY02937	chaperonin containing TCP-1 delta subunit	1.482	2.083	2.378	*
PY02940	putative yir3 protein	-1.436	-1.06	-1.114	*
PY02946	unnamed protein product, putative	0.4405	1.312	0.1923
PY02952	hypothetical protein	0.9586	1.5	1.5
PY02959	transmission-blocking target antigen s230 precursor	0.01158	-0.9555	-1.085
PY02968	hypothetical protein	1.465	1.635	1.829	*
PY02970	putative yir4 protein	1.135	0.7937	1.107
PY02971	putative yir4 protein	3.463	3.173	2.46	*
PY02972	putative yir3 protein	4.649	4.029	2.546	*
PY02973	putative yir4 protein	6.005	6.284	5.863	*
PY02976	putative bir1 protein	-1.198	-1.371	-0.6529
PY02981	hypothetical protein	0.5711	1.156	-0.6461
PY02994	putative methionyl-tRNA synthetase	2.032	1.883	1.921	*
PY02996	putative yir4 protein	4.161	3.105	2.435	*
PY03004	hypothetical protein	0.148	-0.4652	-1.043
PY03005	hypothetical protein	-0.3733	-0.6787	-1.044
PY03006	hypothetical protein	-1.001	-0.5288	-0.8936
PY03018	putative bir1 protein	1.264	1.377	1.462	*
PY03041	putative yir2 protein	3.523	4.198	4.844	*
PY03042	putative yir3 protein	5.488	6.769	5.851	*
PY03043	putative bir1 protein	3.571	3.345	3.215	*
PY03056	hypothetical protein	0.7281	0.9653	1.219
PY03071	Drosophila melanogaster CG15040 gene product	0.8238	1.401	0.4676
PY03074	hypothetical protein	0.03149	-0.1135	-1.074
PY03079	hypothetical protein	-2.013	-0.2403	-0.7962
PY03088	Pfs77 protein-related	-1.013	-0.4634	-1.438
PY03123	hypothetical protein	0.7937	1.029	1.124
PY03129	hypothetical protein	3.59	3.171	2.214	*
PY03130	repetitive proline rich protein, putative	-0.7571	-0.6218	-1.204
PY03134	hypothetical protein	0.6699	0.9983	1.516
PY03136	nhp2-like protein 1-related	0.8193	0.3133	1.053
PY03143	Arabidopsis thaliana At3g45100/T14D3_40-related	-1.086	-0.6683	-0.4771
PY03145	hypothetical protein	-0.5462	-0.2571	-1.099
PY03162	hypothetical protein	-0.1374	-1.139	-0.4753
PY03185	hypothetical protein	0.2725	-0.01944	-1.644
PY03195	putative yir3 protein	-5.233	-5.717	-5.444	*
PY03202	hypothetical protein	-1.791	-2.268	-1.95	*
PY03243	hypothetical protein	-0.1357	1.443	1.74
PY03248	hypothetical protein	1.47	1.502	1.139	*
PY03256	lipase precursor gehm. 6/101	1.201	1.636	1.587	*
PY03260	hypothetical protein	2.612	2.67	4.457	*
PY03273	hypothetical protein	-0.3704	-0.08722	-1.246
PY03297	hypothetical protein	1.525	2.16	1.79	*
PY03301	adenylosuccinate synthetase	1.158	1.066	0.9847
PY03315	putative yir4 protein	-2.209	-1.635	-1.643	*
PY03317	cdc-2 related kinase 1	1.054	0.9659	-0.3092
PY03340	hypothetical protein	5.512	15.63	2.793	*
PY03341	putative yir1 protein	5.503	5.271	3.889	*
PY03346	hypothetical protein	-2.188	-1.367	-0.9135
PY03348	hypothetical protein	-3.242	-1.864	-1.704	*
PY03358	putative yir4 protein	4.299	2.735	2.537	*
PY03359	putative bir1 protein	2.317	1.435	1.263	*
PY03369	hypothetical protein	0.9944	1.049	1.209
PY03388	hypothetical protein	-2.167	-1.285	-1.695	*
PY03389	hypothetical protein	-1.962	-1.221	-1.628	*
PY03402	putative yir4 protein	1.326	2.031	2.228	*
PY03405	hypothetical protein	3.143	3.971	4.813	*
PY03422	hypothetical protein	-1.17	-0.3271	-1.115
PY03430	hypothetical protein	2.114	2.907	2.822	*
PY03434	hypothetical protein	1.324	1.661	1.493	*
PY03438	putative bir1 protein	0.9523	1.03	0.759
PY03455	putative dual-specificity protein phosphatase	1.367	1.17	-0.3158
PY03459	hypothetical protein	-0.3648	-0.3753	-1.443
PY03460	hypothetical protein	1.332	0.6726	0.8645
PY03473	ribonucleoside-diphosphate reductase large chain	-0.368	-0.3881	-1.069
PY03484	hypothetical protein	1.09	1.782	1.383	*
PY03486	putative yir1 protein	2.619	2.682	1.822	*
PY03490	hypothetical protein	-1.01	-0.2739	-0.01688
PY03495	hypothetical protein	0.7096	1.167	0.9151
PY03515	Plasmodium falciparum CPW-WPC domain, putative	-1.114	-0.9455	-1.526
PY03516	hypothetical protein	-1.1	-1.154	-1.758	*
PY03527	hypothetical protein	-1.57	-0.01098	-1.336
PY03530	hypothetical protein	-0.7791	0.1861	-1.119
PY03535	membrane skeletal protein IMC1	-1.39	-0.6705	-1.026
PY03551	hypothetical protein	0.01909	-0.2227	-1.459
PY03561	asparagine-rich protein	0.9557	1.375	1.184
PY03577	unnamed protein product	-0.9833	-0.4059	-1.101
PY03580	putative yir2 protein	6.766	6.993	5.783	*
PY03587	similar ATP-dependent RNA Helicase	1.037	0.8277	0.3899
PY03588	putative yir3 protein	-1.144	-1.261	-0.8942
PY03618	coronin binding protein	3.377	3.367	2.526	*
PY03619	Drosophila melanogaster GH21295p	-1.607	-0.3902	-1.159
PY03636	putative yir3 protein	5.043	5.455	4.859	*
PY03646	similar to unknown protein	-1.074	-1.165	-0.5517
PY03647	hypothetical protein	0.0568	0.369	1.187
PY03657	hypothetical protein	3.737	4.785	6.294	*
PY03662	hypothetical protein	-1.114	-1.513	-1.172	*
PY03670	hypothetical protein	-0.6926	-1.212	-1.07
PY03671	Ribonucleotide reductase, small chain	-1.009	-1.287	-0.6193
PY03675	hypothetical protein	-1.362	-1.395	-1.575	*
PY03681	KED, putative	-0.5451	-0.7964	-1.065
PY03689	Drosophila melanogaster CG15040 gene product	-0.4285	-0.4351	-1.746
PY03690	hypothetical protein	-1.125	-0.4448	-1.644
PY03697	hypothetical protein	-1.664	-0.6448	-1.122
PY03698	ERYTHROCYTE MEMBRANE PROTEIN PFEMP3	-1.509	-0.203	-0.8289
PY03705	C2 domain, putative	-0.01425	-0.1659	-1.113
PY03718	hypothetical protein	-1.763	-0.005992	-1.137
PY03744	arabinogalactan protein	-0.1039	-0.08597	-1.202
PY03747	putative yir4 protein	0.6095	1.101	1.399
PY03757	hypothetical protein	2.271	1.494	2.507	*
PY03758	putative yir2 protein	2.095	1.81	1.956	*
PY03759	hypothetical protein	4.834	4.788	5.288	*
PY03771	hypothetical protein	-1.361	-0.2011	-1.057
PY03788	hypothetical protein	0.122	0.1882	-1.522
PY03795	hypothetical protein	0.05168	-0.2237	-1.147
PY03800	hypothetical protein	1.36	2.424	2.598	*
PY03805	hypothetical protein	-2.261	-2.621	-3.01	*
PY03826	putative yir4 protein	0.7568	1.429	1.591
PY03836	hypothetical protein	2.118	2.08	1.497	*
PY03837	putative yir4 protein	6.436	6.307	5.888	*
PY03839	Domain of unknown function, putative	3.87	4.058	3.974	*
PY03841	Unknown protein	0.7448	1.455	1.709
PY03857	PfS230 paralog-related	-0.5276	-0.8456	-1.114
PY03858	putative bir1 protein	5.364	4.141	3.37	*
PY03860	hypothetical protein	-0.4092	-1.535	-2.354
PY03866	hypothetical protein	0.9852	1.246	1.381
PY03907	hypothetical protein	-1.437	-1.361	-0.9145
PY03908	hypothetical protein	0.9982	0.767	1.076
PY03915	hypothetical protein	-1.181	-0.4018	0.3355
PY03919	cell division cycle protein 27 homolog	-0.3485	-0.04953	-1.101
PY03936	hypothetical protein	0.7619	1.329	-0.2901
PY03937	hypothetical protein	0.5439	1.071	-0.4997
PY03938	hypothetical protein	0.4516	1.104	-0.6276
PY03943	hypothetical protein	-0.1952	-0.2549	1.116
PY03950	hypothetical protein	5.97	6.109	5.679	*
PY03951	hypothetical protein	4.678	7.175	7.762	*
PY03955	hypothetical protein	0.8212	1.917	3.095
PY03966	putative yir2 protein	-4.963	-4.935	-4.541	*
PY03967	putative yir1 protein	4.473	4.065	2.292	*
PY03968	hypothetical protein	0.6951	0.606	1.92
PY03974	putative yir1 protein	1.608	1.17	1.291	*
PY03979	putative yir1 protein	0.7318	0.7281	1.259
PY03985	putative yir1 protein	4.009	3.455	3.634	*
PY03991	putative yir2 protein	-1.494	-1.141	-0.9316
PY03992	putative yir1 protein	-1.335	-1.099	-0.7882
PY03997	hypothetical protein	2.478	3.36	3.771	*
PY04004	hypothetical protein	2.186	2.342	1.94	*
PY04007	hypothetical protein	1.982	1.807	1.76	*
PY04020	hypothetical protein	-3.024	-2.935	-2.952	*
PY04021	putative yir1 protein	-3.322	-3.301	-3.203	*
PY04036	hypothetical protein	0.6717	-0.1294	-1.013
PY04037	hypothetical protein	0.2179	-0.499	-1.608
PY04041	hypothetical protein	-0.4281	-0.1538	-1.314
PY04043	hypothetical protein	1.296	1.754	1.87	*
PY04052	putative yir2 protein	5.271	4.744	5.438	*
PY04053	putative yir4 protein	-1.135	-1.318	-0.8795
PY04082	putative yir2 protein	0.8683	1.058	1.246
PY04129	hypothetical protein	-1.44	-1.797	-1.586	*
PY04140	Homo sapiens GAJ, putative	-5.085	-2.772	-2.636	*
PY04147	hypothetical protein	0.8357	1.11	1.505
PY04157	putative yir1 protein	2.126	1.786	1.79	*
PY04165	hypothetical protein	-1.227	-0.3754	-1.386
PY04166	hypothetical protein	-2.095	-0.1679	-0.7895
PY04175	hypothetical protein	-0.5681	-1.131	-1.933
PY04176	hypothetical protein	-1.133	-1.018	-2.108	*
PY04183	hypothetical protein	-0.8882	-0.4414	-1.152
PY04184	hypothetical protein	-1.329	-0.5506	-1.326
PY04185	thioredoxin	-1.319	-1.625	-0.9587
PY04188	oxysterol-binding protein-related protein 2	-1.078	-0.8665	-1.2
PY04195	protein Saccharomyces cerevisiae YLL018c-a-related	-0.7145	-0.9583	-1.313
PY04198	Protein kinase domain, putative	-1.338	-2.87	-2.62	*
PY04202	hypothetical protein	-1.566	-0.3059	-1.007
PY04203	hypothetical protein	-0.7571	-0.5879	-1.25
PY04205	Pb47	-5.472	-4.016	-3.093	*
PY04208	putative yir2 protein	3.663	3.543	15.5	*
PY04209	putative bir1 protein	1.278	1.105	0.7339
PY04213	hypothetical protein	-1.272	-1.389	-1.54	*
PY04215	putative yir4 protein	-3.263	-3.992	-4.006	*
PY04227	hypothetical protein	4.939	3.42	3.821	*
PY04228	hypothetical protein	0.5199	1.335	1.515
PY04229	hypothetical protein	-0.7943	-1.655	-1.351
PY04232	Insulinase, putative	-0.7124	-1.626	-1.838
PY04234	hypothetical protein	1.103	1.638	1.638	*
PY04244	hypothetical protein	-1.506	-2.136	-2.744	*
PY04252	hypothetical protein	0.3202	0.1638	1.019
PY04254	tyrosyl-tRNA synthetase 1-related	2.429	3.507	2.957	*
PY04257	RNA pseudouridylate synthase, putative	-0.9557	-1.027	-1.068
PY04261	glutamate dehydrogenase	-1.457	-1.78	-2.414	*
PY04267	putative yir4 protein	4.171	3.677	3.116	*
PY04269	eukaryotic translation initiation factor 3 subunit 7	-2.702	-3.274	-2.889	*
PY04279	hypothetical protein	1.2	2.481	1.708	*
PY04280	hypothetical protein	-1.292	-2.477	-1.507	*
PY04290	hypothetical protein	-4.465	-3.52	-4.735	*
PY04292	hypothetical protein	-1.263	-0.06751	-0.8785
PY04293	hypothetical protein	-2.857	-2.093	-2.602	*
PY04296	protein disulfide isomerase precursor	-1.616	-1.198	-1.24	*
PY04313	hypothetical protein	-2.756	-4.553	-4.888	*
PY04315	hypothetical protein	-6.012	-5.796	-6.526	*
PY04317	hypothetical protein	-2.585	-2.809	-3.837	*
PY04319	putative yir4 protein	4.784	4.389	4.876	*
PY04320	hypothetical protein	1.487	2.424	2.934	*
PY04331	hypothetical protein	-1.302	-0.2091	-0.896
PY04349	Arabidopsis thaliana At5g24810/F6A4_20	-1.025	-0.3208	-1.091
PY04350	hypothetical protein	-0.5008	-0.07292	-1.228
PY04377	hypothetical protein	1.952	2.696	3.324	*
PY04379	putative bir1 protein	1.723	0.7744	0.3263
PY04382	DnaJ domain, putative	-1.174	-0.6904	-0.736
PY04397	hypothetical protein	1.444	1.182	2.463	*
PY04399	hypothetical protein	-2.049	-2.265	-2.309	*
PY04412	putative yir4 protein	5.676	5.17	4.769	*
PY04413	hypothetical protein	4.037	4.697	5.005	*
PY04418	hypothetical protein	-2.452	-2.477	-2.815	*
PY04423	putative yir4 protein	5.444	5.029	4.73	*
PY04474	hypothetical protein	1.09	1.448	1.486	*
PY04487	NUDIX domain	-0.9841	-1.141	-1.046
PY04490	hypothetical protein	0.6816	1.112	1.193
PY04496	replication factor C, 140 kDa subunit	1.368	2.398	2.499	*
PY04502	hypothetical protein	-2.097	-0.4156	-1.002
PY04511	putative yir3 protein	1.058	0.6962	0.7631
PY04520	hypothetical protein	0.7087	1.951	2.366
PY04521	hypothetical protein	0.6259	1.769	2.343
PY04544	axonemal dynein heavy chain 8-related	-0.4046	-0.254	-1.323
PY04549	Drosophila melanogaster CG15040 gene product	1.948	3.232	2.99	*
PY04550	hypothetical protein	3.753	5.799	5.309	*
PY04557	hypothetical protein	-2.164	-0.3454	-1.345
PY04579	hypothetical protein	-1.759	-1.097	-0.6753
PY04628	hypothetical protein	-0.581	-0.9454	-1.185
PY04634	hypothetical protein	0.02712	-0.1794	-1.326
PY04647	235 kDa rhoptry protein	0.6431	1.638	1.993
PY04663	hypothetical protein	4.421	6.727	5.571	*
PY04667	putative yir2 protein	1.57	0.6972	0.1475
PY04672	hypothetical protein	1.465	0.413	0.4836
PY04693	hypothetical protein	-0.5554	-0.7171	-1.198
PY04703	hypothetical protein	1.173	1.048	0.9479
PY04709	hypothetical protein	1.195	0.3934	-0.08101
PY04714	Drosophila melanogaster CG4392 gene product	1.504	2.502	2.794	*
PY04737	putative bir1 protein	-5.167	-5.154	-4.387	*
PY04738	hypothetical protein	-1.04	-0.7635	-0.7009
PY04743	hypothetical protein	0.9601	1.66	1.755
PY04774	PfS230 paralog-related	-0.9064	-0.9935	-1.313
PY04775	hypothetical protein	-1.337	-1.4	-0.4961
PY04782	putative yir2 protein	1.189	1.165	1.531	*
PY04783	putative yir4 protein	4.233	4.309	4.103	*
PY04806	putative yir4 protein	2.324	1.887	1.228	*
PY04808	putative yir4 protein	3.016	3.351	3.9	*
PY04811	hypothetical protein	0.8012	0.4915	1.087
PY04835	Streptococcus pyogenes AMV156, putative	0.6684	1.154	1.5
PY04839	hypothetical protein	0.7761	1.066	1.193
PY04855	putative yir4 protein	2.343	2.272	2.302	*
PY04864	hypothetical protein	-2.259	-0.6469	-1.055
PY04866	hypothetical protein	1.244	1.833	1.996	*
PY04876	hypothetical protein	1.293	1.573	1.546	*
PY04893	hypothetical protein	0.2265	0.5352	1.007
PY04898	pf20 homolog	-0.311	-0.5185	-1.668
PY04899	hypothetical protein	0.08838	-0.1458	-1.235
PY04915	hypothetical protein	1.518	2.475	1.806	*
PY04922	ERYTHROCYTE MEMBRANE PROTEIN PFEMP3	-3.307	-2.417	-3.54	*
PY04930	235 kDa rhoptry protein	3.04	4.67	4.247	*
PY04931	putative yir4 protein	7.336	3.059	2.958	*
PY04939	putative yir3 protein	0.9598	1.244	1.045
PY04940	hypothetical protein	0.6661	0.6473	1.118
PY04958	hypothetical protein	-1.144	-1.408	-0.2991
PY04964	putative yir2 protein	-5.147	-6.057	-7.176	*
PY04969	unnamed protein product-related	1.668	2.409	2.685	*
PY04980	putative yir1 protein	2.515	3.138	3.719	*
PY04988	putative yir4 protein	6.225	7.01	4.698	*
PY04989	hypothetical protein	5.277	3.997	7.262	*
PY04996	putative yir3 protein	2.622	2.262	1.494	*
PY04997	hypothetical protein	1.526	1.568	1.659	*
PY04998	putative yir4 protein	3.916	2.565	2.797	*
PY05009	hypothetical protein	1.26	1.433	1.464	*
PY05010	putative yir1 protein	0.1446	1.543	2.051
PY05011	hypothetical protein	-1.544	-1.524	-0.9277
PY05012	hypothetical protein	1.784	1.836	1.807	*
PY05013	hypothetical protein	-1.068	-1.24	-0.8789
PY05021	putative yir2 protein	1.531	2.536	2.761	*
PY05024	hypothetical protein	0.8429	1.03	1.14
PY05041	hypothetical protein	3.056	3.963	3.567	*
PY05042	hypothetical protein	2.164	2.576	2.428	*
PY05072	CCAAT-box DNA binding protein subunit B	1.713	2.553	2.574	*
PY05074	hypothetical protein	0.8565	1.521	1.154
PY05081	hypothetical protein	-1.86	-1.444	-1.418	*
PY05083	Zinc finger, C2H2 type, putative	1.617	1.215	0.9909
PY05090	LCCL domain-containing protein CCP2-related	-2.113	-0.6392	-0.8628
PY05092	hypothetical protein	-1.99	-1.752	-1.468	*
PY05094	hypothetical protein	-2.68	-2.295	-1.981	*
PY05109	ATPase associated with chromosome architecture/replication	1.016	1.323	1.576	*
PY05146	putative yir3 protein	1.595	2.065	2.063	*
PY05148	putative yir4 protein	4.379	0.7187	-0.004767
PY05150	putative yir3 protein	4.433	3.222	2.752	*
PY05156	DNA-directed RNA polymerase beta chain	0.7035	1.692	1.83
PY05167	hypothetical protein	0.8044	2.507	2.334
PY05172	hypothetical protein	-2.598	-2.471	-2.517	*
PY05173	hypothetical protein	-1.927	-1.7	-1.808	*
PY05178	homeobox-containing protein	1.867	2.041	2.011	*
PY05189	homeobox-containing protein	0.5281	1.165	1.13
PY05190	hypothetical protein	1.609	2.471	2.122	*
PY05194	hypothetical protein	0.9005	1.226	0.9392
PY05195	hypothetical protein	1.782	2.872	2.848	*
PY05219	hypothetical protein	2.492	3.499	2.84	*
PY05228	hypothetical protein	-1.169	-0.4118	-0.9714
PY05232	hypothetical protein	4.267	4.596	4.323	*
PY05243	putative yir1 protein	4.62	3.681	6.863	*
PY05244	putative yir1 protein	3.471	2.783	1.798	*
PY05260	hypothetical protein	-0.9854	-1.221	-1.549
PY05261	hypothetical protein	0.02122	0.009984	-1.021
PY05279	hypothetical protein	0.8559	2.171	1.478
PY05299	hypothetical protein	4.161	5.342	15.5	*
PY05310	hypothetical protein	1.28	0.1926	0.1625
PY05312	hypothetical protein	1.77	0.5292	1.079
PY05324	ribosomal protein S12, putative	0.3514	0.3858	1.203
PY05340	hypothetical protein	-1.118	-0.595	-1.508
PY05352	hypothetical protein	1.091	2.063	1.838	*
PY05360	hypothetical protein	1.84	2.477	2.763	*
PY05363	putative yir1 protein	2.492	1.422	0.1045
PY05367	vps26 protein homolog	-1.162	-0.4953	-0.4084
PY05408	hypothetical protein	-2.498	-2.917	-3.87	*
PY05409	hypothetical protein	-3.276	-3.386	-4.385	*
PY05410	putative yir2 protein	5.892	4.91	4.185	*
PY05412	hypothetical protein	2.424	2.852	2.721	*
PY05413	hypothetical protein	-0.03394	-0.06226	-1.261
PY05424	hypothetical protein	0.7239	1.025	0.2277
PY05428	putative yir3 protein	3.162	3.656	3.433	*
PY05433	hypothetical protein	4.397	4.159	4.97	*
PY05437	putative yir3 protein	4.999	5.849	6.675	*
PY05442	putative yir2 protein	5.318	5.03	5.442	*
PY05455	putative yir2 protein	6.355	6.236	6.72	*
PY05456	hypothetical protein	5.974	5.798	5.917	*
PY05459	delta-aminolevulinic acid synthetase	-1.518	0.04484	1.218
PY05464	hypothetical protein	-0.09928	-0.3084	-1.317
PY05465	hypothetical protein	1.042	0.4905	0.9856
PY05476	hypothetical protein	-1.241	-0.6822	-1.385
PY05479	hypothetical protein	1.991	2.591	2.183	*
PY05489	histidine kinase DhkG	3.235	4.837	4.284	*
PY05499	hypothetical protein	-2.212	-1.51	-1.195	*
PY05528	hypothetical protein	-0.8868	-0.3863	-1.588
PY05534	hypothetical protein	1.032	1.374	1.399	*
PY05541	hypothetical protein	2.083	1.783	2.147	*
PY05543	Tetrahymena thermophila Igr3p	-0.01732	-0.01203	-1.045
PY05547	hypothetical protein	-1.9	-1.573	-1.339	*
PY05558	asparagine-rich protein	-0.2575	-0.157	-1.227
PY05569	hypothetical protein	-1.116	0.04485	-0.572
PY05575	undecaprenyl pyrophosphate synthetase-like-related	0.9295	2.284	1.861
PY05606	Smt3 activating enzyme 1	2.402	2.326	2.466	*
PY05608	hypothetical protein	1.096	1.89	2.114	*
PY05615	hypothetical protein	-1.209	-0.7415	-0.3949
PY05616	Cyclin, putative	-1.194	-0.4669	-0.05111
PY05624	putative yir4 protein	2.196	3.443	2.983	*
PY05635	hypothetical protein	5.052	5.083	5.005	*
PY05636	putative yir3 protein	1.812	2.029	2.002	*
PY05638	putative yir3 protein	2.243	2.756	2.611	*
PY05656	putative yir2 protein	2.652	3.184	3.478	*
PY05666	A/G-specific adenine glycosylase, putative	0.415	1.142	1.423
PY05673	putative yir3 protein	2.938	1.141	0.7508
PY05674	CCAAT-box DNA binding protein subunit B	0.7019	1.057	0.2709
PY05675	putative yir4 protein	4.262	4.666	3.64	*
PY05685	hypothetical protein	-1.086	-0.9378	-0.9193
PY05686	hypothetical protein	-1.078	-0.9787	-0.606
PY05706	hypothetical protein	0.4537	0.7197	1.038
PY05708	putative yir3 protein	6.009	8.168	6.114	*
PY05709	putative yir3 protein	15.73	4.289	3.89	*
PY05710	Putative snoRNA binding domain, putative	1.473	1.697	1.916	*
PY05730	neurofilament-H	-1.007	-0.1446	-0.2013
PY05738	hypothetical protein	0.6238	1.161	0.9253
PY05740	putative yir1 protein	2.015	1.366	2.062	*
PY05756	putative 60S Ribosomal protein L7	1.107	1.074	1.038	*
PY05764	putative ubiquinone biosynthesis protein	0.8061	1.688	1.906
PY05775	hypothetical protein	0.7193	1.494	1.144
PY05781	putative yir3 protein	-2.145	-2.103	-1.955	*
PY05783	hypothetical protein	3.402	3.216	2.68	*
PY05784	hypothetical protein	-0.2109	-0.7052	-1.655
PY05785	hypothetical protein	1.139	1.692	1.501	*
PY05788	isoleucyl-tRNA synthetase	-0.369	0.1681	1.154
PY05794	putative yir3 protein	6.196	6.09	15.6	*
PY05795	hypothetical protein	0.8342	1.729	1.268
PY05806	hypothetical protein	0.1133	-0.9041	-2.006
PY05809	hypothetical protein	1.778	1.773	1.88	*
PY05818	Putative Methyltransferase-related	0.165	1.707	2.381
PY05822	putative yir4 protein	8.067	15.75	4.828	*
PY05835	hypothetical protein	-0.3358	-0.3883	-1.528
PY05848	hypothetical protein	0.8762	1.249	1.848
PY05852	hypothetical protein	2.063	2.722	2.814	*
PY05855	Mechanosensitive ion channel, putative	-0.9227	-0.5806	-1.364
PY05873	putative yir4 protein	2.741	2.815	1.762	*
PY05874	hypothetical protein	0.6704	1.751	1.719
PY05888	Plasmodium vivax PV1H14220_P	1.288	2.461	2.396	*
PY05907	NAD(P) transhydrogenase beta subunit, putative	-0.2069	-0.3564	-1.044
PY05917	hypothetical protein	-1.041	-1.25	-0.5931
PY05926	hypothetical protein	-0.2249	-0.7544	-1.265
PY05942	putative yir2 protein	5.364	4.971	5.153	*
PY05943	putative yir3 protein	4.4	3.199	3.103	*
PY05957	hypothetical protein	-1.029	-1.168	-0.8431
PY05961	homeobox-containing protein	0.9997	1.733	2.018
PY05964	hypothetical protein	-0.4403	-0.4531	-1.106
PY05966	hypothetical protein	-1.518	-1.163	-0.1972
PY05972	Mus musculus RIKEN cDNA 5033406L14 gene-related	-1.126	-0.8263	-1.091
PY05981	MORN repeat, putative	0.5323	1.349	1.308
PY05998	hypothetical protein	4.275	1.128	0.6039
PY06032	hypothetical protein	-1.152	-0.9615	-0.3428
PY06034	hypothetical protein	2.508	2.072	3.684	*
PY06039	hypothetical protein	0.8797	1.255	1.419
PY06048	hypothetical protein	0.648	1.366	-1.161
PY06052	ERYTHROCYTE MEMBRANE PROTEIN PFEMP3	-0.8699	0.0545	-1.21
PY06053	hypothetical protein	1.086	1.424	1.55	*
PY06056	putative yir4 protein	0.9793	0.6696	1.219
PY06092	hypothetical protein	1.373	0.7545	1.276
PY06093	hypothetical protein	-1.279	-1.608	-1.388	*
PY06105	Arabidopsis thaliana T27G7.17, putative	0.4164	0.8312	1.186
PY06122	hypothetical protein	-0.2225	0.9105	1.734
PY06129	putative yir3 protein	3.594	3.359	3.602	*
PY06131	putative yir3 protein	5.527	2.911	3.392	*
PY06141	putative bir1 protein	4.183	3.42	2.908	*
PY06149	putative bir1 protein	-2.37	-1.946	-2.296	*
PY06154	hypothetical protein	-1.726	-1.651	-1.244	*
PY06159	hypothetical protein	3.78	3.73	4.01	*
PY06171	putative yir3 protein	3.835	3.974	3.491	*
PY06180	unnamed protein product	2.223	1.981	1.987	*
PY06188	putative yir1 protein	5.765	4.766	6.429	*
PY06193	hypothetical protein	4.218	4.767	3.689	*
PY06202	hypothetical protein	1.891	3.092	3.325	*
PY06216	hypothetical protein	1.056	1.042	1.14	*
PY06220	putative bir1 protein	5.765	7.155	5.028	*
PY06229	hypothetical protein	5.056	6.377	4.622	*
PY06249	related to CG16984 PROTEIN	0.9717	0.6311	-1.824
PY06279	putative yir2 protein	1.483	2.575	2.764	*
PY06281	dimethyladenosine transferase, putative	0.6755	0.6859	1.441
PY06284	gamma-gliadin	0.2685	1.6	1.321
PY06292	fulmal1	0.6436	1.418	1.189
PY06293	hypothetical protein	0.8585	0.9318	1.053
PY06317	hypothetical protein	2.277	3.76	2.785	*
PY06324	putative yir1 protein	6.596	5.776	4.225	*
PY06332	hypothetical protein	-0.9883	-0.3241	-1.446
PY06335	putative yir3 protein	1.789	0.825	0.7671
PY06340	putative yir2 protein	4.731	6.449	4.635	*
PY06352	putative yir4 protein	5.851	8.709	5.158	*
PY06353	hypothetical protein	1.061	0.5436	0.1199
PY06354	hypothetical protein	0.7705	0.3025	1.085
PY06355	hypothetical protein	-1.561	-1.514	-1.366	*
PY06356	hypothetical protein	-1.261	-0.8154	-0.6327
PY06358	hypothetical protein	-1.906	-0.3728	-1.316
PY06366	hypothetical protein	-0.1984	-1.024	-1.172
PY06376	hypothetical protein	-0.8344	-1.076	-1.337
PY06381	p235 rhoptry protein E5	-4.143	-8.89	-10.03	*
PY06392	hypothetical protein	1.359	2.332	1.893	*
PY06394	calcium-dependent protein kinase-3	-0.6765	1.086	0.8187
PY06408	hypothetical protein	1.367	1.88	1.49	*
PY06415	merozoite surface protein precursor	5.645	5.534	5.205	*
PY06426	hypothetical protein	1.299	1.322	1.622	*
PY06441	Drosophila melanogaster CG15040 gene product	-1.047	-0.6002	-1.264
PY06442	Saccharomyces cerevisiae ORF 2310-related	0.929	1.113	2.304
PY06467	ubiquitin activating enzyme E1-like protein-related	-2.194	-1.611	-1.443	*
PY06494	hypothetical protein	0.5569	0.6973	1.232
PY06497	putative yir3 protein	15.73	3.52	3.64	*
PY06498	hypothetical protein	0.4479	1.496	1.669
PY06499	putative yir4 protein	3.486	3.431	2.315	*
PY06500	hypothetical protein	1.082	1.626	1.608	*
PY06508	putative yir1 protein	2.989	1.954	1.979	*
PY06510	hypothetical protein	-1.216	-1.484	-1.211	*
PY06536	putative yir2 protein	-1.512	-1.43	-1.392	*
PY06543	Kinesin motor domain, putative	-0.8333	-0.4132	-1.262
PY06549	putative yir2 protein	-5.152	-5.613	-4.833	*
PY06553	hypothetical protein	-1.127	-0.1271	-0.9951
PY06554	MAP kinase-related	-1.234	-0.1515	-0.9035
PY06555	hypothetical protein	0.5683	0.9392	1.02
PY06558	Drosophila melanogaster CG11779 gene product, putative	1.062	0.8284	0.5286
PY06579	hypothetical protein	3.51	5.344	4.91	*
PY06581	hypothetical protein	3.734	3.878	3.593	*
PY06583	Endonuclease/Exonuclease/phosphatase family	1.139	0.9356	1.147
PY06594	hypothetical protein	0.5214	1.309	1.247
PY06596	hypothetical protein	-1.223	-2.255	-2.119	*
PY06600	KED	-0.3262	-0.1313	-1.206
PY06611	putative bir1 protein	-1.274	-1.306	-0.7193
PY06612	hypothetical protein	-1.058	-1.158	-0.9567
PY06623	hypothetical protein	-0.2358	0.6733	1.281
PY06628	hypothetical protein	-0.3641	-0.3082	-1.135
PY06633	hypothetical protein	-0.88	-1.007	-0.5694
PY06640	Arabidopsis thaliana At1g71270/F3I17_8	1.696	2.53	2.41	*
PY06649	putative yir3 protein	-2.276	-2.543	-2.031	*
PY06664	hypothetical protein	0.9452	1.667	2.256
PY06671	hypothetical protein	-1.268	-0.7134	-0.518
PY06678	putative yir1 protein	6.26	15.74	4.322	*
PY06687	Leucine Rich Repeat, putative	-0.0008518	1.552	0.5766
PY06690	hypothetical protein	-0.7322	-0.234	-1.039
PY06698	TERT gene	-0.1252	0.112	-1.228
PY06700	putative yir3 protein	2.531	1.941	1.727	*
PY06703	hypothetical protein	1.161	0.5803	0.5808
PY06721	putative yir3 protein	5.95	4.997	4.477	*
PY06726	similar to S. cerevisiae RRP45, putative	0.6888	1.142	1.332
PY06738	hypothetical protein	1.574	2.56	2.794	*
PY06743	putative yir3 protein	5.868	5.613	4.179	*
PY06752	hypothetical protein	0.08234	1.009	-0.8026
PY06754	putative yir1 protein	1.846	0.8872	0.4931
PY06762	CCAAT-box DNA binding protein subunit B	0.9039	1.7	0.9822
PY06763	putative yir4 protein	2.969	3.27	4.471	*
PY06773	hypothetical protein	0.1574	0.8833	1.006
PY06779	hypothetical protein	-1.249	-0.8012	-1.32
PY06781	hypothetical protein	2.29	3.287	2.959	*
PY06782	putative bir1 protein	-3.085	-7.25	-3.475	*
PY06787	Ribosomal protein L36e	4.53	3.942	4.064	*
PY06793	hypothetical protein	0.7646	1.855	2.066
PY06795	putative yir3 protein	6.646	5.985	6.723	*
PY06805	putative yir1 protein	3.216	5.039	3.332	*
PY06807	putative yir4 protein	-6.062	-5.322	-5.322	*
PY06815	hypothetical protein	2.793	3.159	2.618	*
PY06826	Enoyl-CoA hydratase, putative	-1.405	-0.5726	-0.1401
PY06828	hypothetical protein	0.3886	1.014	-0.884
PY06829	putative yir4 protein	2.78	1.911	1.389	*
PY06834	putative yir4 protein	1.74	1.509	2.186	*
PY06839	hypothetical protein	0.6381	0.3274	1.028
PY06850	hypothetical protein	6.977	6.933	6.892	*
PY06856	hypothetical protein	1.843	2.385	2.403	*
PY06861	putative yir3 protein	2.183	2.028	1.291	*
PY06879	hypothetical protein	2.354	3.525	15.5	*
PY06891	putative yir1 protein	5.996	9.343	5.721	*
PY06892	hypothetical protein	2.672	2.293	1.707	*
PY06894	hypothetical protein	-1.325	-0.1104	-0.9096
PY06905	DNA repair protein rad10, putative	-0.1381	0.5972	1.063
PY06914	hypothetical protein	1.375	2.59	2.652	*
PY06929	hypothetical protein	-1.161	0.006045	-0.6071
PY06931	hypothetical protein	0.8032	1.161	1.268
PY06942	hypothetical protein	-1.143	-0.006926	-0.2975
PY06945	rhoptry protein	1.689	2.741	2.44	*
PY06951	Myb1 protein-related	-0.6877	-1.045	-0.3801
PY06978	hypothetical protein	-1.309	-0.1719	-1.112
PY06980	Thioredoxin, putative	-1.076	-0.7657	-0.2119
PY06992	Arabidopsis thaliana MKA23.5	-0.7171	-1.257	-1.476
PY06993	putative bir1 protein	5.831	7.045	6.289	*
PY07007	syntaxin 5	1.52	0.4925	0.8967
PY07009	hypothetical protein	1.855	2.079	2.02	*
PY07014	integrase-related	-0.8244	-1.026	-1.271
PY07027	putative yir4 protein	5.526	5.309	5.302	*
PY07034	hypothetical protein	1.155	2.134	2.124	*
PY07036	putative yir2 protein	5.312	6.483	5.746	*
PY07050	hypothetical protein	3.02	4.478	4.326	*
PY07052	putative yir2 protein	1.77	1.902	2.143	*
PY07053	putative yir4 protein	2.906	1.03	0.6145
PY07065	hypothetical protein	-0.5165	-1.019	-0.6731
PY07066	homeobox-containing protein	-1.226	0.5566	0.9892
PY07070	hypothetical protein	3.503	2.474	2.507	*
PY07076	hypothetical protein	-0.5892	-1.621	-1.049
PY07099	putative yir3 protein	1.954	1.495	1.184	*
PY07119	hypothetical protein	-0.4281	-0.5519	-1.338
PY07120	hypothetical protein	-0.2793	-0.4791	-1.388
PY07125	putative yir1 protein	1.617	2.139	2.048	*
PY07127	putative yir2 protein	1.932	2.453	2.524	*
PY07149	putative yir4 protein	6.255	3.388	2.146	*
PY07155	hypothetical protein	-0.6043	-0.3824	-1.097
PY07170	hypothetical protein	-2.922	-2.25	-4.548	*
PY07176	OGG1 protein type 2e-related	-1.058	-0.1855	0.0359
PY07180	Dictyostelium discoideum SgcA	2.547	2.752	2.812	*
PY07186	hypothetical protein	-0.656	-0.1897	-1.118
PY07200	chitinase-related	0.09467	-0.08366	-1.091
PY07227	homeobox-containing protein	-2.624	-0.4021	-1.487
PY07229	putative small nuclear ribonucleoprotein polypeptide G	3.995	4.171	2.084	*
PY07230	hypothetical protein	-1.025	-1.244	-1.268	*
PY07232	hypothetical protein	-0.9645	-0.6933	-1.249
PY07238	hypothetical protein	-1.129	-0.9057	0.01914
PY07245	hypothetical protein	4.443	5.016	4.896	*
PY07257	hypothetical protein	1.457	1.325	1.028	*
PY07258	probable DNA-directed RNA polymerase iii 34 kDa polypeptide	-1.419	-1.476	-2.645	*
PY07270	hypothetical protein	-1.855	-1.991	-1.572	*
PY07275	t-complex protein 1, alpha subunit	0.6992	0.98	1.507
PY07290	hypothetical protein	0.4277	1.494	1.327
PY07291	splicing factor 3a subunit 3	1.882	1.845	1.67	*
PY07293	putative yir3 protein	1.218	1.042	1.503	*
PY07300	hypothetical protein	-0.3435	-0.3591	-1.01
PY07301	hypothetical protein	-1.597	-1.267	-1.521	*
PY07305	putative yir4 protein	1.987	2.293	2.603	*
PY07308	hypothetical protein	1.366	2.244	1.689	*
PY07310	hypothetical protein	0.9277	1.464	1.208
PY07318	Drosophila melanogaster CG15040 gene product	-1.144	-0.4875	-1.04
PY07319	hypothetical protein	-1.653	-0.478	-1.27
PY07324	hypothetical protein	0.6671	1.008	0.935
PY07325	putative yir4 protein	7.068	6.23	6.683	*
PY07327	putative yir4 protein	2.216	2.067	2.343	*
PY07328	hypothetical protein	1.243	2.018	2.007	*
PY07335	hypothetical protein	1.563	2.073	2.73	*
PY07342	putative yir4 protein	1.346	1.252	1.075	*
PY07347	hypothetical protein	0.7122	1.633	2.533
PY07371	isoleucyl-tRNA syntehtase-related	-0.2443	0.8611	1.958
PY07375	similar to L1 retrotransposon, TF subfamily L1MD-TF18	-0.04039	-1.139	-1.529
PY07378	hypothetical protein	5.052	9.719	7.401	*
PY07379	hypothetical protein	0.7262	1.107	1.14
PY07396	hypothetical protein	1.049	1.29	1.9	*
PY07422	putative yir4 protein	0.5866	0.5311	1.421
PY07430	calcium/calmodulin-stimulated cyclic nucleotide phosphodiesterase, putative	-2.322	-0.2051	-0.7437
PY07446	hypothetical protein	-1.063	-0.2948	-0.8776
PY07451	hypothetical protein	5.545	4.613	4.544	*
PY07464	hypothetical protein	1.462	1.126	1.529	*
PY07477	putative yir3 protein	-1.317	-1.5	-1.243	*
PY07479	hypothetical protein	2.063	1.978	1.02	*
PY07488	expressed protein, putative	0.15	-0.2445	-1.261
PY07490	hypothetical protein	1.091	0.655	0.08782
PY07501	putative yir3 protein	2.756	3.202	3.902	*
PY07516	putative bir1 protein	6.702	2.747	4.655	*
PY07518	putative yir3 protein	5.389	5.43	5.087	*
PY07524	putative yir1 protein	6.206	4.769	5.394	*
PY07530	hypothetical protein	-0.0885	0.0007638	-1.479
PY07542	Homo sapiens A_IG002N01.1 gene product, putative	1.325	1.706	1.846	*
PY07546	putative yir3 protein	5.548	5.161	5.587	*
PY07547	hypothetical protein	4.79	1.28	0.4565
PY07552	hypothetical protein	-2.483	-1.447	-4.459	*
PY07556	hypothetical protein	-1.278	0.3293	0.1029
PY07559	hypothetical protein	2.128	4.769	7.632	*
PY07562	hypothetical protein	0.8256	1.771	1.858
PY07574	putative yir3 protein	-0.7983	-1.147	-0.5536
PY07577	putative yir4 protein	-1.07	-1.254	-1.013	*
PY07597	Plasmodium falciparum CG6	3.462	3.325	3.151	*
PY07603	hypothetical protein	0.002047	-0.9706	-1.276
PY07628	putative yir1 protein	3.32	2.88	2.057	*
PY07635	putative yir3 protein	4.753	5.217	6.693	*
PY07637	putative yir4 protein	0.9842	0.5472	1.37
PY07645	cir2 protein	1.282	1.715	1.101	*
PY07650	hypothetical protein	-0.4611	-0.6019	-1.453
PY07678	hypothetical protein	-1.074	0.251	-0.1029
PY07681	micronemal protein WARP	-0.9872	-0.3461	-1.371
PY07682	hypothetical protein	0.152	-0.02572	-1.016
PY07821	hypothetical protein	1.473	1.277	1.814	*
PY07836	hypothetical protein	0.3984	1.285	1.467
